# Supplementary material for: Dual control of MAPK activities by AP2C1 and MKP1 MAPK phosphatases regulates defence responses in Arabidopsis
Source: PubMed Central journal article supplement (PMC9015810; doi:10.1093/jxb/erac018), 2022-01-28
Supplement: erac018_suppl_supplementary_figures_s1-s6_tables_s1-s5.pdf [file erac018_suppl_supplementary_figures_s1-s6_tables_s1-s5.pdf]

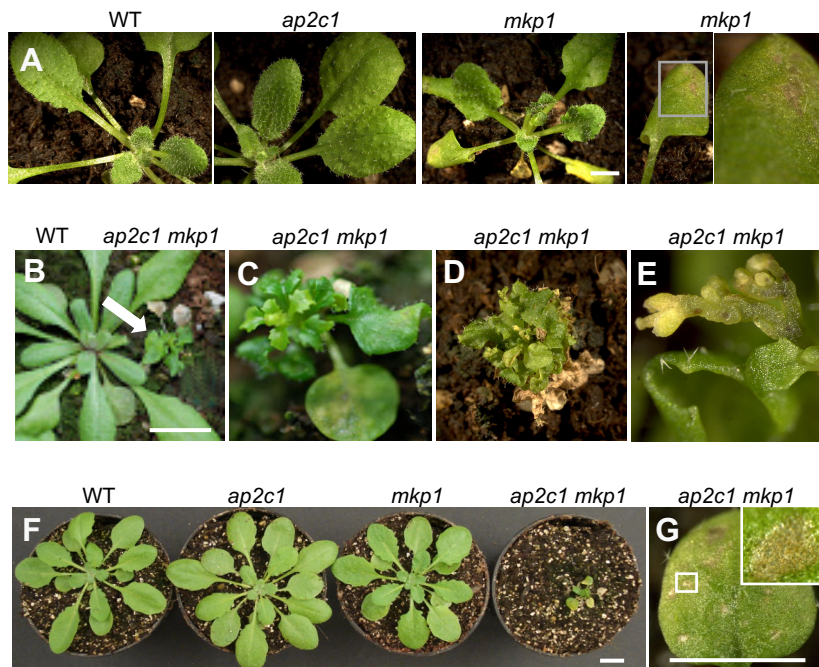

**Supplementary Fig. S1. Loss of both AP2C1 and MKP1 leads to severe phenotypes in growth and development.**

**(A)** Phenotypes of WT, *ap2c1*, and *mkp1* plants grown for three weeks in long-day conditions. Scale bars = 0.5 cm.

**(B)** Phenotypes of WT (left) and *ap2c1 mkp1* (right, indicated by arrow) grown for 3.5 weeks in standard long-day conditions. During the first 18 days of growth, the phenotypic differences of *ap2c1 mkp1* compared to WT plants are visibly manifested as a difference in plant size while after approximately 3.5 weeks (26 days) premature death of leaf tissue as well as abnormal leaf growth and morphology of *ap2c1 mkp1* plants (right, indicated by arrow) become apparent. Scale bar = 1 cm.

**(C)** Close-up of *ap2c1 mkp1* plant grown for 3.5 weeks in standard long-day condition.

**(D)** Phenotype of seven-week-old *ap2c1 mkp1* plant grown in standard long-day condition.

**(E)** Close-up of seven-week-old *ap2c1 mkp1* plant showing misshaped inflorescence.

**(F)** Phenotypes of WT, *ap2c1*, *mkp1* and *ap2c1 mkp1* plants grown for 8 weeks in short-day conditions. Scale bars = 1 cm.

**(G)** Formation of macroscopic lesions in leaves of *ap2c1 mkp1* plant shown in Supplemental Fig. 1F. Scale bars = 0.5 cm.

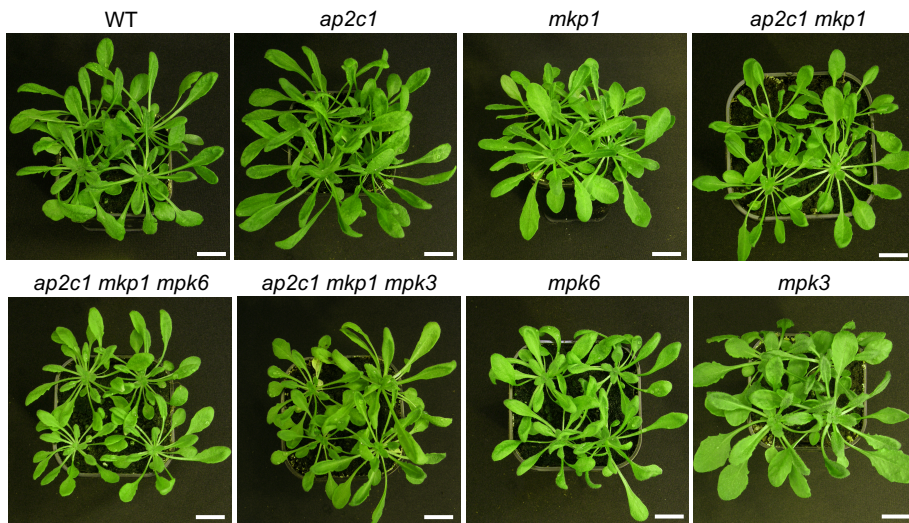

**Supplemental Fig. S2. Plant phenotypes grown in conditions with increased humidity and elevated temperature.**

Phenotypes of five-week-old plants of the indicated genotypes grown in a tray with closed lid in short day conditions at 24°C and saturating relative humidity. Scale bars = 1 cm.

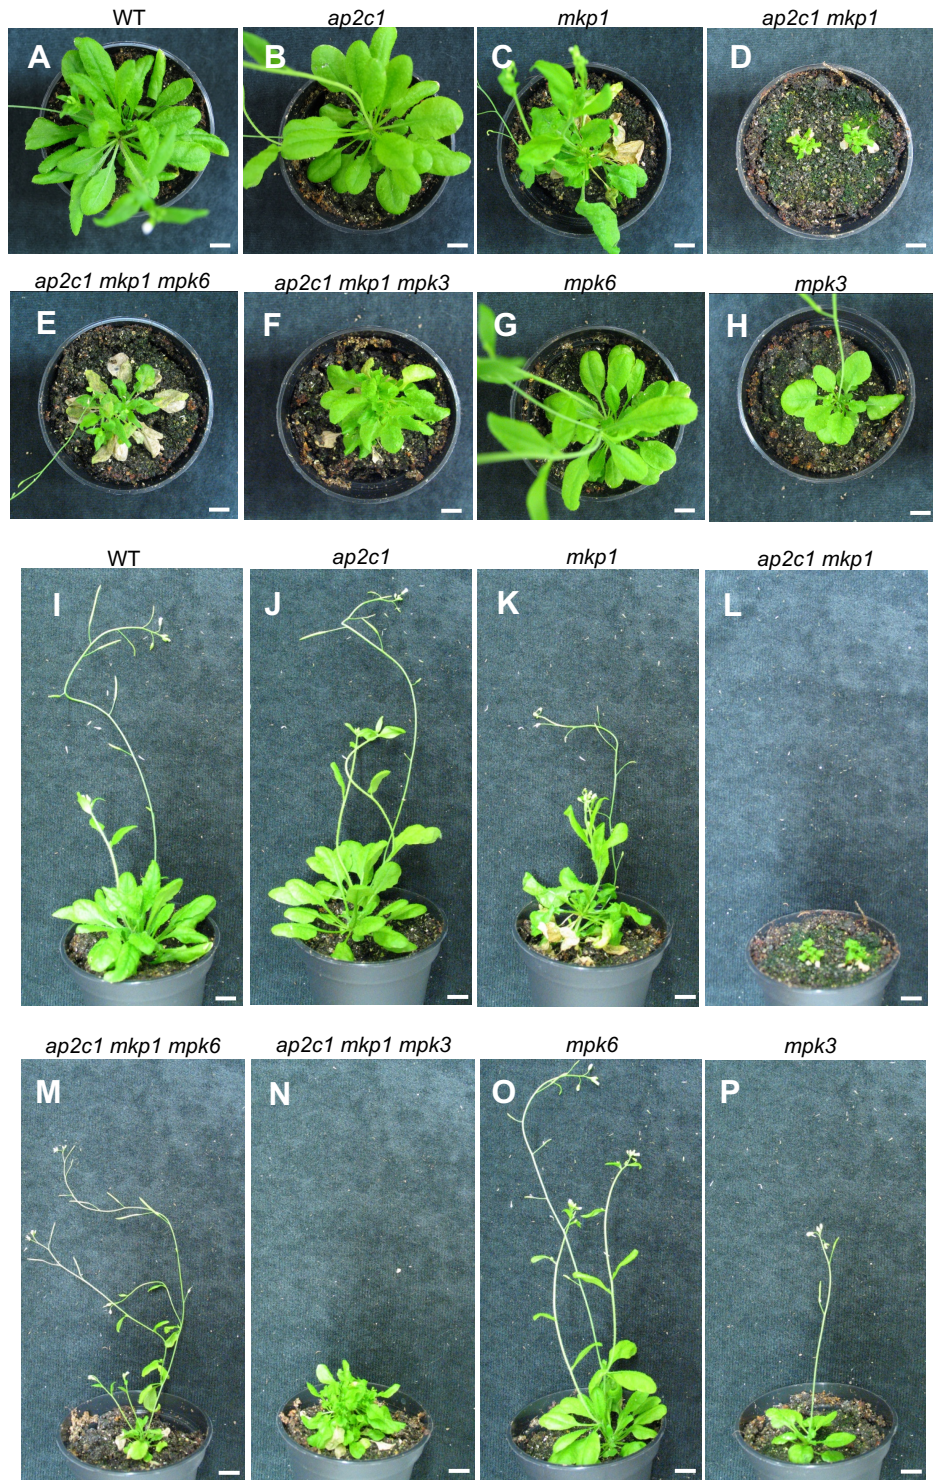

**Supplementary Fig. S3. Phenotypes of Arabidopsis single, double and triple mutant plants.**

(A – H) Phenotypes of plants of the indicated genotypes grown for four weeks in short-day conditions, followed by three weeks in long-day conditions. Scale bars = 1 cm.

(I – P) Phenotypes of eight-week-old plants of the indicated genotypes grown for the first six weeks in short-day and for a further two weeks in long-day conditions. The *ap2c1 mkp1* double mutant displays a severe dwarf phenotype, premature leaf decay, lack of normal shoot development, and strongly impaired inflorescence growth. These phenotypes were mainly rescued in *ap2c1 mkp1 mpk6* mutant plants, and partially in *ap2c1 mkp1 mpk3* mutant plants. Scale bars = 1 cm.

A

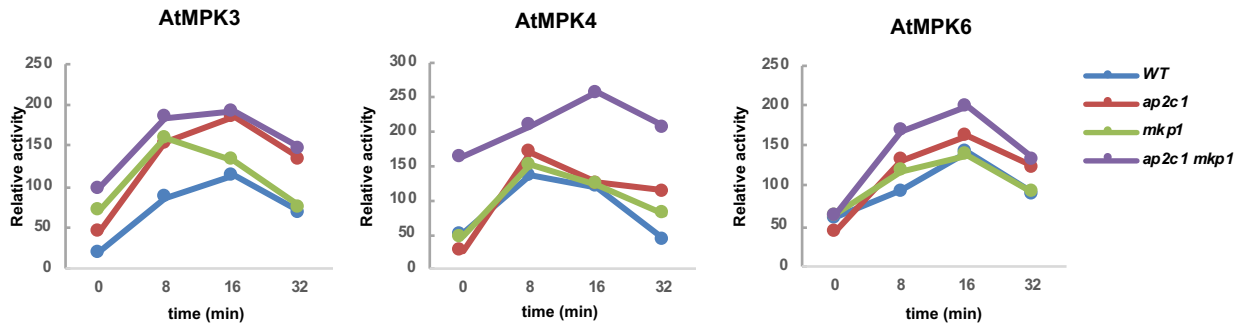

B

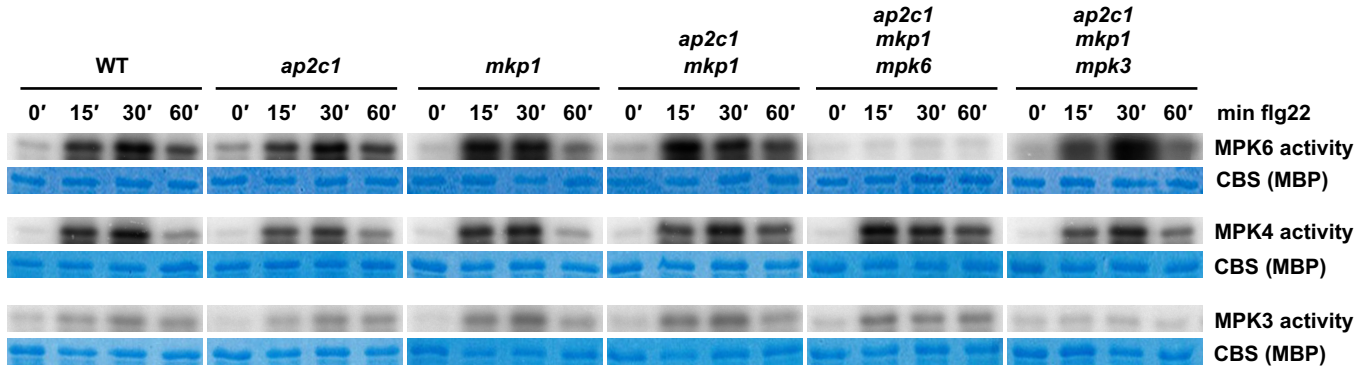

C

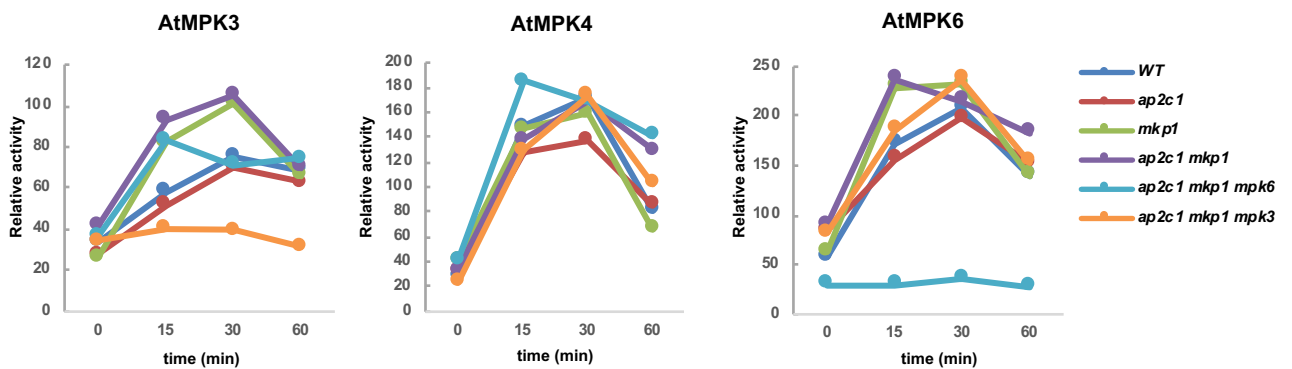

### Supplementary Fig. S4. AP2C1 and MKP1 control stress-induced MAPK activities.

(A) Quantification of wound-induced MAPK activities as shown in Fig. 2. The radioactive signals were captured by a phosphorimaging plate, scanned with a laser-based scanner (Typhoon) and signal intensities determined using ImageQuant software. Time (min): minutes after wounding; relative activity: obtained values were divided by factor 10000.

(B) Analysis of flg22-induced MPK6, MPK4 and MPK3 kinase activities of leaves from five-week-old plants of the indicated genotypes grown in short-day conditions. MAPK activities were determined after immunoprecipitation by phosphorylation of myelin basic protein (MBP) detected by autoradiography. The entire kinase assay is based on one common master mix containing MBP and  $\gamma$ -ATP. Loading is demonstrated by Coomassie Blue staining (CBS); min flg22: minutes after treatment with 100 nM flg22.

(C) Quantification of flg22-induced MAPK activities shown in Supplementary Fig. 4B. The radioactive signals were captured by a phosphorimaging plate, scanned with a laser-based scanner (Typhoon) and signal intensities determined using ImageQuant software. Time (min): minutes after flg22 treatment; relative activity: obtained values were divided by factor 10000.

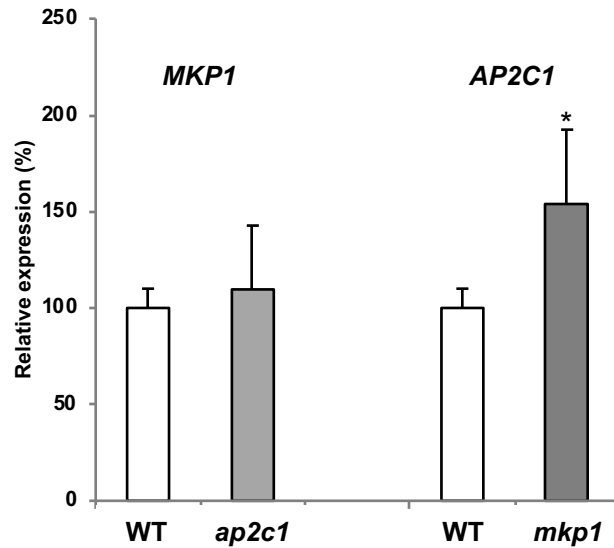

**Supplementary Fig. S5. Detection of *MKP1* and *AP2C1* expression levels in *ap2c1* and *mkp1* mutants.**

Levels of *MKP1* and *AP2C1* transcripts were quantified by RT-qPCR in 14-day-old seedlings grown in long-day conditions, and compared with levels in WT plants. Transcript amounts of *MKP1* and *AP2C1* in WT were taken as 100%. The relative transcript amounts were normalized to the reference gene, *ACTIN2*. Error bars indicate SD. Results are the mean of two biological and two technical replicates for each experiment, \* $p < 0.05$  Student's *t*-test.

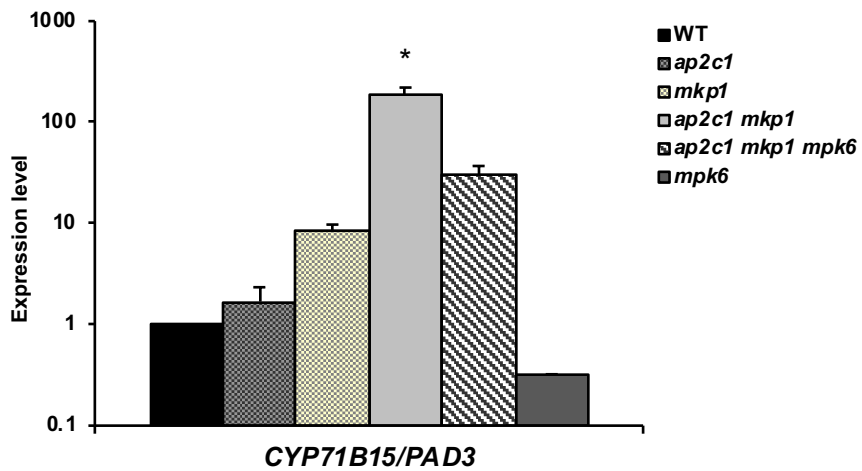

**Supplementary Fig. S6. Upregulation of the camalexin biosynthetic gene *CYP71B15/PAD3* is mainly mediated by MPK6.**

Transcript level of *CYP71B15/PAD3*, an enzyme required for camalexin biosynthesis, was quantified by RT-qPCR in plants of the indicated genotypes and compared to WT, where expression levels were set to 1. Bars represent mean values of at least three replicates  $\pm$  SD, expressed on a log<sub>10</sub> scale. \* $p < 0.05$ , Student's *t*-test.

**Supplementary Table S1. Expression of TF-encoding genes modulated by the absence of AP2C1 but not of MKP1.** Transcript levels were quantified by RT-qPCR and expressed as  $\log_2$  of fold change (FC) for each mutant compared to WT. Genes affected by at least 1.56-fold only in *ap2c1* while not more than 0.9-fold in *mkp1* are listed. Data are from two independent biological replicates and are reported with SE.

| AGI       | gene family | gene name(s) | <i>ap2c1</i><br>$\log_2$ FC | SE of $-\Delta\Delta ct$ | <i>mkp1</i><br>$\log_2$ FC | SE of $-\Delta\Delta ct$ |
|-----------|-------------|--------------|-----------------------------|--------------------------|----------------------------|--------------------------|
| At2g46130 | WRKY        | WRKY43       | <b>1.56</b>                 | 0.40                     | -0.46                      | 0.77                     |
| At1g65130 | C2H2        |              | <b>-1.90</b>                | 0.13                     | -0.42                      | 0.29                     |
| At3g27810 | MYB         | MYB21/MYB3   | <b>-3.79</b>                | 0.32                     | -0.27                      | 0.35                     |

**Supplementary Table S2. Expression of TF-encoding genes modulated by the absence of MKP1 but not of AP2C1.** Transcript levels were quantified by RT-qPCR and are expressed  $\log_2$  of fold change (FC) for each mutant compared to WT. Genes affected by at least 1.56-fold only in *mkp1* while not more than 0.9-fold in *ap2c1* are listed. Data are from two independent biological replicates and are reported with SE.

| AGI       | gene family | gene name(s) | <i>ap2c1</i><br>$\log_2$ FC | SE of $-\Delta\Delta ct$ | <i>mkp1</i><br>$\log_2$ FC | SE of $-\Delta\Delta ct$ |
|-----------|-------------|--------------|-----------------------------|--------------------------|----------------------------|--------------------------|
| At5g43650 | bHLH        | BHLH92       | -0.19                       | 0.75                     | <b>3.77</b>                | 0.27                     |
| At1g71520 | AP2/EREBP   |              | 0.41                        | 0.91                     | <b>3.71</b>                | 0.54                     |
| At5g13080 | WRKY        | WRKY75       | 0.61                        | 0.13                     | <b>3.21</b>                | 0.09                     |
| At3g49760 | bZIP        | BZIP5        | -0.40                       | 0.69                     | <b>2.49</b>                | 0.20                     |
| At2g43000 | NAC         | ANAC042/JUB1 | 0.61                        | 0.04                     | <b>2.36</b>                | 0.29                     |
| At2g33710 | AP2/EREBP   |              | 0.34                        | 0.10                     | <b>2.29</b>                | 0.35                     |
| At5g56960 | bHLH        |              | -0.14                       | 0.25                     | <b>2.29</b>                | 0.15                     |
| At2g47190 | MYB         | MYB2         | 0.48                        | 0.11                     | <b>2.23</b>                | 0.30                     |
| At1g66600 | WRKY        | WRKY63       | -0.60                       | 0.25                     | <b>2.13</b>                | 0.70                     |
| At5g13330 | AP2/EREBP   | RAP2.6L      | 0.63                        | 0.05                     | <b>2.08</b>                | 0.16                     |
| At1g48150 | MADS        | AgL74        | 0.76                        | 0.09                     | <b>1.93</b>                | 0.17                     |
| At2g22770 | bHLH        | NAI          | 0.56                        | 0.48                     | <b>1.81</b>                | 0.75                     |
| At3g23230 | AP2/EREBP   | ERF98        | -0.16                       | 0.08                     | <b>1.78</b>                | 0.76                     |
| At2g38340 | AP2/EREBP   | DREB19       | 0.31                        | 0.13                     | <b>1.75</b>                | 0.13                     |
| At5g23000 | MYB         | MYB37        | 0.87                        | 0.33                     | <b>1.69</b>                | 0.46                     |
| At1g62975 | bHLH        |              | 0.12                        | 0.45                     | <b>1.62</b>                | 0.40                     |
| At1g25470 | AP2/EREBP   | CRF12        | 0.41                        | 0.89                     | <b>1.58</b>                | 0.14                     |
| At2g27220 | HB          | BLH5         | -0.47                       | 0.14                     | <b>-1.57</b>               | 0.69                     |
| At2g25820 | AP2/EREBP   | ESE2         | -0.21                       | 0.20                     | <b>-1.65</b>               | 0.22                     |
| At3g58070 | C2H2        | glS          | -0.46                       | 0.41                     | <b>-1.87</b>               | 0.12                     |
| At3g46130 | MYB         | MYB48        | -0.23                       | 0.19                     | <b>-1.97</b>               | 0.22                     |
| At3g15320 | MYB         |              | -0.70                       | 0.05                     | <b>-2.00</b>               | 0.64                     |
| At3g53680 | PHD finger  |              | -0.41                       | 0.04                     | <b>-2.06</b>               | 0.15                     |
| At5g51870 | MADS        | AgL71        | -0.68                       | 0.14                     | <b>-2.09</b>               | 0.20                     |
| At4g22950 | MADS        | AgL19        | 0.58                        | 0.63                     | <b>-2.48</b>               | 0.11                     |

**Supplementary Table S3. Expression of TF-encoding genes modulated by the absence of both MKP1 and AP2C1.** Transcript levels were quantified by RT-qPCR and are expressed as fold change (FC) in  $\log_2$  scale for each of the mutants compared to WT. Genes affected by at least 1.56-fold both in *ap2c1* and *mkp1* are listed. Data are from two independent biological replicates and are reported with SE.

| AGI       | gene family | gene name(s)    | <i>ap2c1</i><br>$\log_2$ FC | SE of $-\Delta\Delta ct$ | <i>mkp1</i><br>$\log_2$ FC | SE of $-\Delta\Delta ct$ |
|-----------|-------------|-----------------|-----------------------------|--------------------------|----------------------------|--------------------------|
| At3g47870 | AS2 (LOB) I | ASL29/LBD27/SCP | <b>2.24</b>                 | 0.25                     | <b>3.57</b>                | 0.07                     |
| At2g13150 | bZIP        | BZIP31          | <b>2.25</b>                 | 0.77                     | <b>3.76</b>                | 0.76                     |
| At1g03790 | C3H         | SOM/TZF4        | <b>2.27</b>                 | 0.15                     | <b>1.81</b>                | 0.49                     |
| At1g18860 | WRKY        | WRKY61          | <b>1.99</b>                 | 0.11                     | <b>2.49</b>                | 0.08                     |

**Supplementary Table S4. TF-encoding genes deregulated in *ap2c1 mkp1* plants.**

Gene transcript levels were quantified by RT-qPCR and expressed as fold change in log<sub>2</sub> scale for each of the mutants compared to WT. Genes affected in *ap2c1 mkp1* compared to WT by at least 1.56-fold in log<sub>2</sub> scale are listed. Data are from three independent biological replicates and are reported with SD.

| upregulated in <i>ap2c1 mkp1</i>   |              |                     |              |      |             |      |                   |      |
|------------------------------------|--------------|---------------------|--------------|------|-------------|------|-------------------|------|
| AGI                                | family       | gene name(s)        | <i>ap2c1</i> |      | <i>mkp1</i> |      | <i>ap2c1 mkp1</i> |      |
|                                    |              |                     | -ΔAct        | SD   | -ΔAct       | SD   | -ΔAct             | SD   |
| A15g13330                          | AP2/EREBP    | RAF2.6L             | 0.53         | 0.15 | 2.33        | 0.37 | 5.79              | 1.77 |
| A11g36060                          | AP2/EREBP    | WIND3               | -0.60        | 0.50 | 1.77        | 0.09 | 4.60              | 0.95 |
| A13g23240                          | AP2/EREBP    | ERF1                | 1.02         | 0.11 | 2.65        | 0.20 | 4.44              | 1.85 |
| A12g38340                          | AP2/EREBP    | DREB19              | 0.54         | 0.37 | 1.81        | 0.39 | 4.43              | 1.35 |
| A11g04370                          | AP2/EREBP    | ERF14/ERF97         | 1.57         | 0.24 | 1.35        | 0.77 | 4.43              | 2.11 |
| A12g47520                          | AP2/EREBP    | ERF71/HRE2          | 0.78         | 0.81 | 0.22        | 0.41 | 4.06              | 1.50 |
| A15g64750                          | AP2/EREBP    | ABR1                | 0.46         | 0.91 | 1.13        | 0.72 | 2.38              | 0.33 |
| A12g33710                          | AP2/EREBP    |                     | 0.59         | 0.50 | 3.09        | 0.84 | 5.56              | 0.83 |
| A11g71520                          | AP2/EREBP    |                     | 0.41         | 0.91 | 3.71        | 0.54 | 5.05              | 1.33 |
| A13g23230                          | AP2/EREBP    | ERF98               | -0.16        | 0.08 | 1.91        | 1.24 | 3.58              | 0.40 |
| A12g40470                          | AS2 (LOB) I  | LBD15               | 0.31         | 0.94 | 1.72        | 0.51 | 4.30              | 1.10 |
| A11g67100                          | AS2 (LOB) II | LBD40               | 0.79         | 1.00 | 1.54        | 0.37 | 5.91              | 1.92 |
| A15g43650                          | bHLH         | BHLH92              | -0.03        | 0.65 | 2.22        | 2.20 | 5.88              | 1.94 |
| A12g43140                          | bHLH         | BHLH129             | 0.17         | 0.14 | 1.78        | 0.24 | 4.02              | 0.79 |
| A15g56960                          | bHLH         |                     | -0.14        | 0.25 | 1.94        | 1.21 | 5.62              | 0.81 |
| A11g08320                          | bZIP         | BZIP21/TGA9         | 0.93         | 0.64 | 1.87        | 0.25 | 4.15              | 1.14 |
| A13g53600                          | C2H2         | ZAT18               | 0.59         | 1.13 | 1.38        | 1.84 | 4.58              | 2.56 |
| A15g67450                          | C2H2         | AZF1                | -0.12        | 0.48 | 0.64        | 0.35 | 3.33              | 1.15 |
| A15g04390                          | C2H2         |                     | 0.15         | 0.62 | -0.22       | 0.93 | 2.88              | 0.82 |
| A12g37430                          | C2H2         | ZAT11               | 0.21         | 0.66 | 0.33        | 0.73 | 2.68              | 0.27 |
| A13g46080                          | C2H2         |                     | 0.21         | 0.65 | 0.80        | 0.57 | 7.15              | 1.26 |
| A13g46090                          | C2H2         | ZAT7                | -0.77        | 0.40 | 0.16        | 0.55 | 5.92              | 0.92 |
| A15g59820                          | C2H2         | ZAT12/RHL41         | 0.54         | 1.14 | 0.50        | 0.84 | 4.14              | 0.85 |
| A11g13300                          | GARP-G2-like | HRS1/NGT1.4         | 0.38         | 1.09 | 0.46        | 1.17 | 4.50              | 0.96 |
| A15g19520                          | HB           | MSL9                | 0.91         | 0.91 | 0.02        | 1.56 | 2.47              | 0.38 |
| A14g36990                          | HSF          | HSFB1/HSF4/TBF1     | 0.63         | 0.44 | 0.31        | 1.13 | 4.62              | 1.21 |
| A14g18870                          | HSF          |                     | 3.27         | 0.83 | 1.24        | 1.10 | 7.52              | 2.84 |
| A15g20240                          | MADS         |                     | 0.02         | 0.88 | 0.56        | 0.95 | 4.86              | 1.06 |
| A15g23000                          | MYB          | MYB37/RAX1          | 0.87         | 0.33 | 1.77        | 0.40 | 4.26              | 1.44 |
| A11g18570                          | MYB          | MYB51/HIG1          | 0.21         | 0.50 | 0.60        | 0.54 | 2.62              | 0.70 |
| A11g74080                          | MYB          | MYB122              | 0.21         | 0.58 | 0.61        | 1.06 | 8.00              | 1.78 |
| A13g23250                          | MYB          | MYB15               | 0.93         | 0.94 | 0.45        | 0.72 | 4.51              | 1.75 |
| A11g02250                          | NAC          | ANAC005             | -0.68        | 0.15 | 0.23        | 0.51 | 5.57              | 1.69 |
| A11g02220                          | NAC          | ANAC003             | 0.34         | 0.90 | 0.52        | 0.50 | 4.65              | 0.93 |
| A13g04070                          | NAC          | ANAC047             | 0.84         | 0.62 | 1.57        | 0.67 | 4.32              | 0.86 |
| A13g15500                          | NAC          | ANAC055             | 0.90         | 0.70 | 2.28        | 1.11 | 3.88              | 1.29 |
| A11g01010                          | NAC          | ANAC001             | -0.03        | 0.38 | -0.02       | 0.62 | 3.12              | 0.63 |
| A13g44350                          | NAC          | ANAC061             | -0.41        | 0.62 | -0.78       | 0.59 | 3.09              | 1.05 |
| A12g43000                          | NAC          | ANAC042             | 0.78         | 0.62 | 3.16        | 0.83 | 4.94              | 1.89 |
| A12g38250                          | Trihelix     |                     | -0.01        | 0.68 | 0.19        | 0.69 | 3.13              | 0.93 |
| A13g01970                          | WRKY         | WRKY45              | 0.56         | 0.20 | 1.40        | 0.82 | 4.66              | 1.63 |
| A15g46350                          | WRKY         | WRKY8               | 0.38         | 0.84 | 0.94        | 0.59 | 3.82              | 1.16 |
| A11g62300                          | WRKY         | WRKY6               | 0.10         | 0.45 | 1.03        | 1.06 | 3.51              | 0.95 |
| A14g01720                          | WRKY         | WRKY47              | 0.06         | 0.10 | 0.74        | 0.66 | 2.77              | 0.76 |
| A14g18170                          | WRKY         | WRKY28              | 0.25         | 0.72 | 0.65        | 1.00 | 2.68              | 0.45 |
| A12g38470                          | WRKY         | WRKY33              | -0.18        | 0.27 | 0.39        | 0.61 | 2.46              | 0.62 |
| A15g13080                          | WRKY         | WRKY75              | 0.34         | 0.30 | 3.55        | 1.20 | 8.31              | 1.12 |
| A15g24110                          | WRKY         | WRKY30              | 1.45         | 0.87 | 2.43        | 0.79 | 7.03              | 0.72 |
| A11g29860                          | WRKY         | WRKY71              | 1.35         | 0.71 | 2.02        | 0.92 | 5.91              | 2.17 |
| A11g18860                          | WRKY         | WRKY61              | 2.00         | 0.09 | 2.90        | 0.59 | 5.46              | 2.48 |
| A11g66560                          | WRKY         | WRKY64              | 0.49         | 1.24 | 1.22        | 0.80 | 5.46              | 1.01 |
| A15g01900                          | WRKY         | WRKY62              | 1.37         | 0.32 | 0.06        | 1.40 | 4.93              | 1.64 |
| A15g22570                          | WRKY         | WRKY38              | 0.67         | 0.30 | 1.40        | 0.52 | 4.92              | 1.54 |
| A15g64810                          | WRKY         | WRKY51              | 0.22         | 0.50 | -0.07       | 1.37 | 4.74              | 1.77 |
| A14g23810                          | WRKY         | WRKY53              | 0.40         | 0.20 | 0.32        | 0.76 | 4.54              | 0.97 |
| A12g40740                          | WRKY         | WRKY55              | 1.22         | 0.59 | 0.07        | 0.81 | 4.13              | 1.54 |
| A11g80840                          | WRKY         | WRKY40              | 0.45         | 1.04 | 1.09        | 0.91 | 3.66              | 0.85 |
| A11g69600                          | ZF-HD        | ATHB29/ZFHD1/ZHD11  | 0.58         | 0.82 | -0.18       | 0.93 | 4.12              | 1.76 |
| downregulated in <i>ap2c1 mkp1</i> |              |                     |              |      |             |      |                   |      |
| AGI                                | family       | gene name(s)        | <i>ap2c1</i> |      | <i>mkp1</i> |      | <i>ap2c1 mkp1</i> |      |
|                                    |              |                     | -ΔAct        | SD   | -ΔAct       | SD   | -ΔAct             | SD   |
| A13g26790                          | ABI3/VP1     | FUS3/FUSCA3         | -0.49        | 0.06 | -5.42       | 1.71 | -6.84             | 2.39 |
| A13g50510                          | AS2 (LOB) I  | LBD28               | -0.09        | 1.26 | -8.09       | 0.51 | -2.15             | 0.34 |
| A14g32280                          | Aux1/IAA     | IAA29               | 0.60         | 1.17 | -0.88       | 0.89 | -3.57             | 0.47 |
| A11g52830                          | Aux1/IAA     | IAA6                | 0.11         | 0.46 | -1.46       | 0.36 | -2.89             | 0.58 |
| A11g04240                          | Aux1/IAA     | IAA3/SHY2           | -0.16        | 0.58 | -0.83       | 0.48 | -2.48             | 0.65 |
| A12g01200                          | Aux1/IAA     | IAA32               | -0.04        | 0.48 | -0.40       | 0.91 | -1.83             | 0.67 |
| A13g21330                          | bHLH         |                     | 0.20         | 0.43 | -1.32       | 1.22 | -4.06             | 0.83 |
| A11g02340                          | bHLH         | FBI1/HFR1/REP1/RSF1 | 0.75         | 0.82 | 0.18        | 1.00 | -3.31             | 1.17 |
| A15g51790                          | bHLH         |                     | 0.46         | 0.41 | 0.14        | 0.25 | -2.69             | 1.13 |
| A15g39860                          | bHLH         | BHLH136/BNQ1/PRE1   | 0.56         | 0.82 | -0.22       | 0.64 | -2.06             | 0.15 |
| A15g15160                          | bHLH         | BHLH134/BNQ2        | -0.09        | 0.19 | -0.61       | 0.41 | -2.03             | 0.68 |
| A15g44260                          | C3H          | TZF5                | 0.67         | 0.94 | -0.71       | 0.98 | -2.93             | 0.69 |
| A13g13840                          | GRAS         |                     | -0.96        | 0.19 | -0.12       | 0.50 | -2.12             | 0.72 |
| A15g27810                          | MADS         |                     | -0.07        | 1.11 | -2.10       | 0.56 | -3.32             | 1.03 |
| A13g15320                          | MYB          |                     | -0.35        | 0.50 | -2.39       | 0.75 | -3.89             | 1.03 |
| A15g56840                          | MYB-related  |                     | 0.01         | 0.73 | -0.53       | 1.35 | -3.61             | 1.77 |
| A11g75250                          | MYB-related  | RL6/RSM3            | -0.31        | 0.53 | -1.09       | 0.20 | -2.47             | 0.81 |
| A15g43290                          | WRKY         | WRKY49              | 0.97         | 0.00 | -1.32       | 0.40 | -3.89             | 1.68 |



**Supplementary Table S5. The Arabidopsis Genome Initiative (AGI) codes of the genes analysed in this report.**

|           |           |           |           |           |           |           |
|-----------|-----------|-----------|-----------|-----------|-----------|-----------|
| At1g01010 | At1g02220 | At1g02250 | At1g02340 | At1g04240 | At1g04370 | At1g07160 |
| At1g08320 | At1g13300 | At1g18570 | At1g18860 | At1g18860 | At1g19210 | At1g29860 |
| At1g36060 | At1g52830 | At1g62300 | At1g66560 | At1g66560 | At1g67100 | At1g69600 |
| At1g71520 | At1g71860 | At1g74080 | At1g75250 | At1g80840 | At2g01200 | At2g30020 |
| At2g33710 | At2g37430 | At2g38250 | At2g38340 | At2g38470 | At2g40180 | At2g40470 |
| At2g40740 | At2g40740 | At2g43000 | At2g43140 | At2g43790 | At2g47520 | At3g01970 |
| At3g04070 | At3g13840 | At3g15320 | At3g15500 | At3g21330 | At3g23230 | At3g23240 |
| At3g23250 | At3g26790 | At3g26830 | At3g44350 | At3g45640 | At3g46080 | At3g46090 |
| At3g50510 | At3g53600 | At3g55270 | At4g01370 | At4g01720 | At4g01720 | At4g18170 |
| At4g18870 | At4g23810 | At4g32280 | At4g36990 | At5g01900 | At5g04390 | At5g13080 |
| At5g13330 | At5g15160 | At5g19520 | At5g20240 | At5g22570 | At5g23000 | At5g24110 |
| At5g27810 | At5g39860 | At5g43290 | At5g43650 | At5g44260 | At5g45890 | At5g46350 |
| At5g51790 | At5g56840 | At5g56960 | At5g59820 | At5g64750 | At5g64810 | At5g67450 |
